# Supplementary material
Source: PubMed Central journal article supplement (PMC3150569)

Supporting Information  
**Synthesis and Characterization of Arylomycin B Natural Product Antibiotics**  
*T.C. Roberts, P.A. Smith, F.E. Romesberg*  
*Department of Chemistry, The Scripps Research Institute, La Jolla, CA*

**Contents**

|                                                           |    |
|-----------------------------------------------------------|----|
| <sup>1</sup> H NMR of Compound <b>10</b> .....            | S2 |
| <sup>13</sup> C NMR of Compound <b>10</b> .....           | S3 |
| <sup>1</sup> H NMR of Compound <b>11</b> .....            | S4 |
| <sup>13</sup> C NMR of Compound <b>11</b> .....           | S5 |
| <sup>1</sup> H NMR of Arylomycin B-C <sub>16</sub> .....  | S6 |
| <sup>13</sup> C NMR of Arylomycin B-C <sub>16</sub> ..... | S7 |
| <sup>1</sup> H NMR of Compound <b>1</b> .....             | S8 |

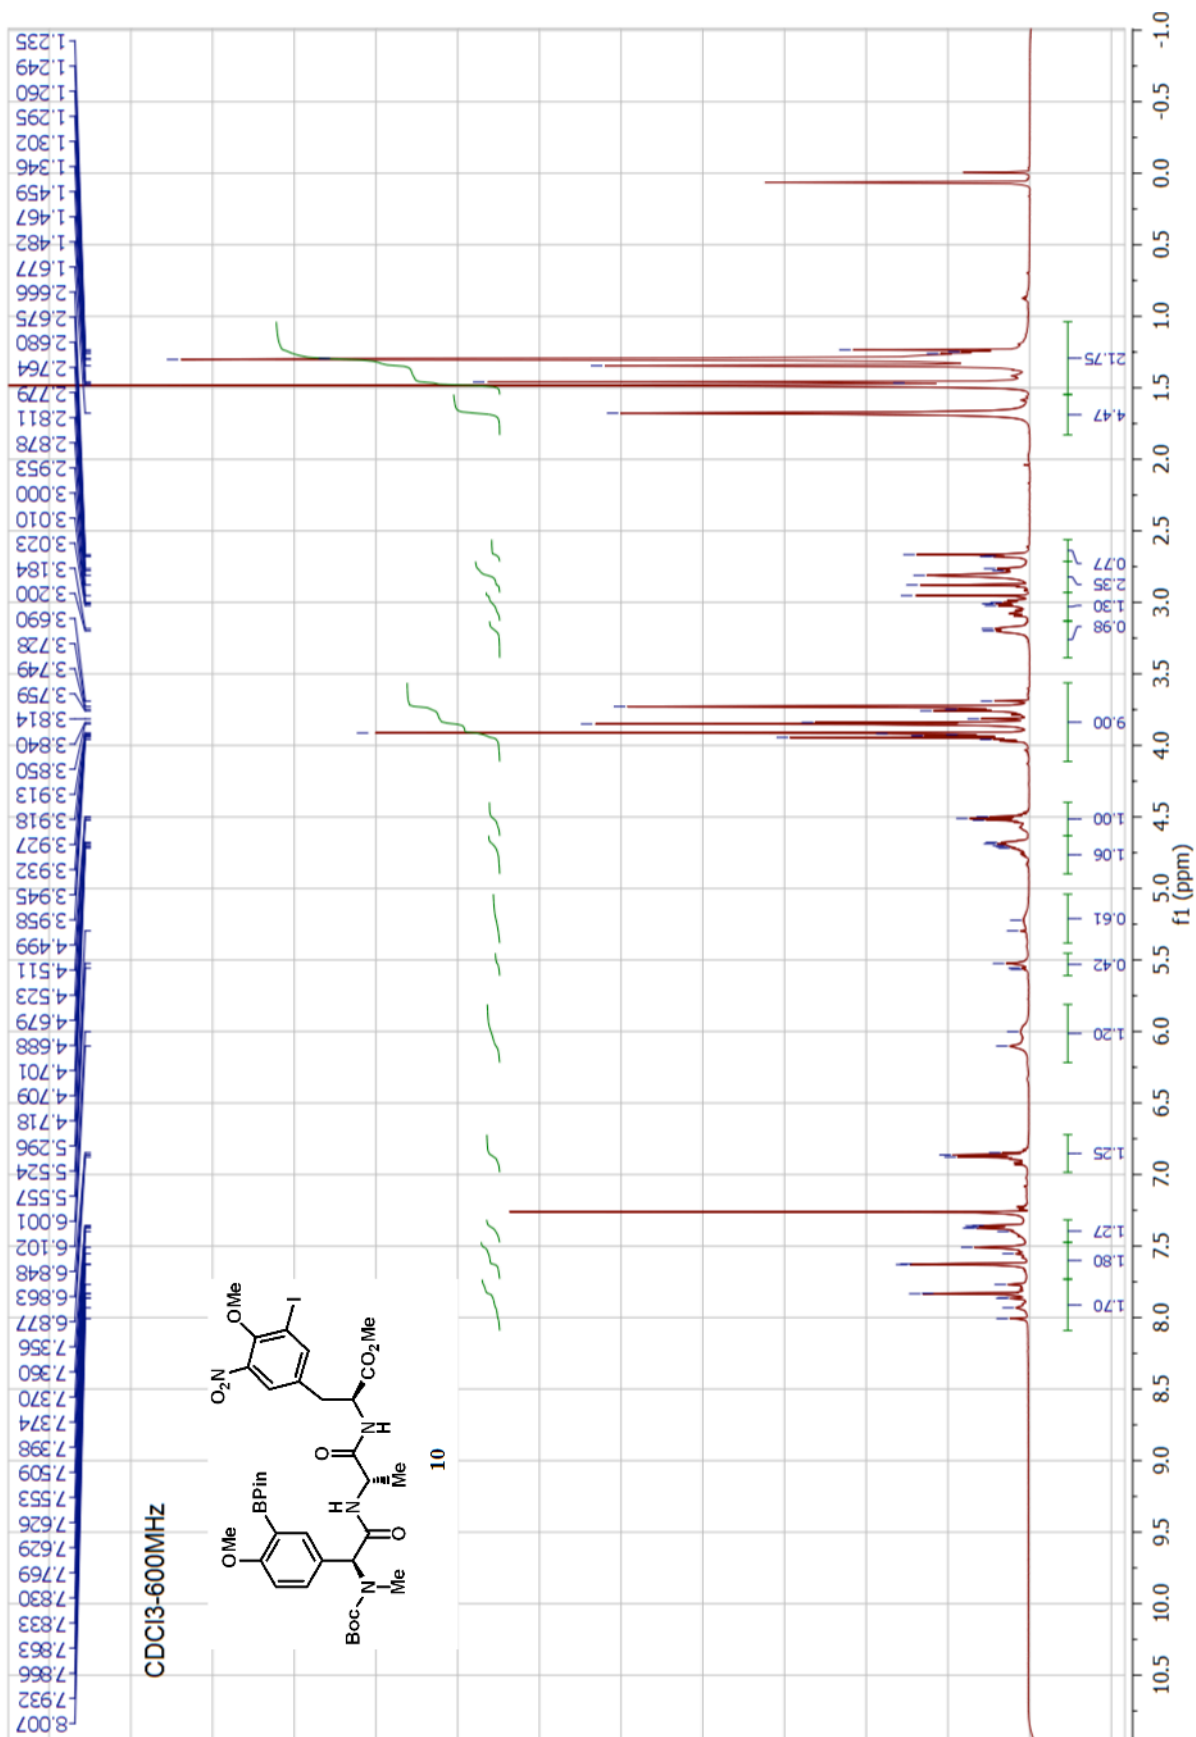

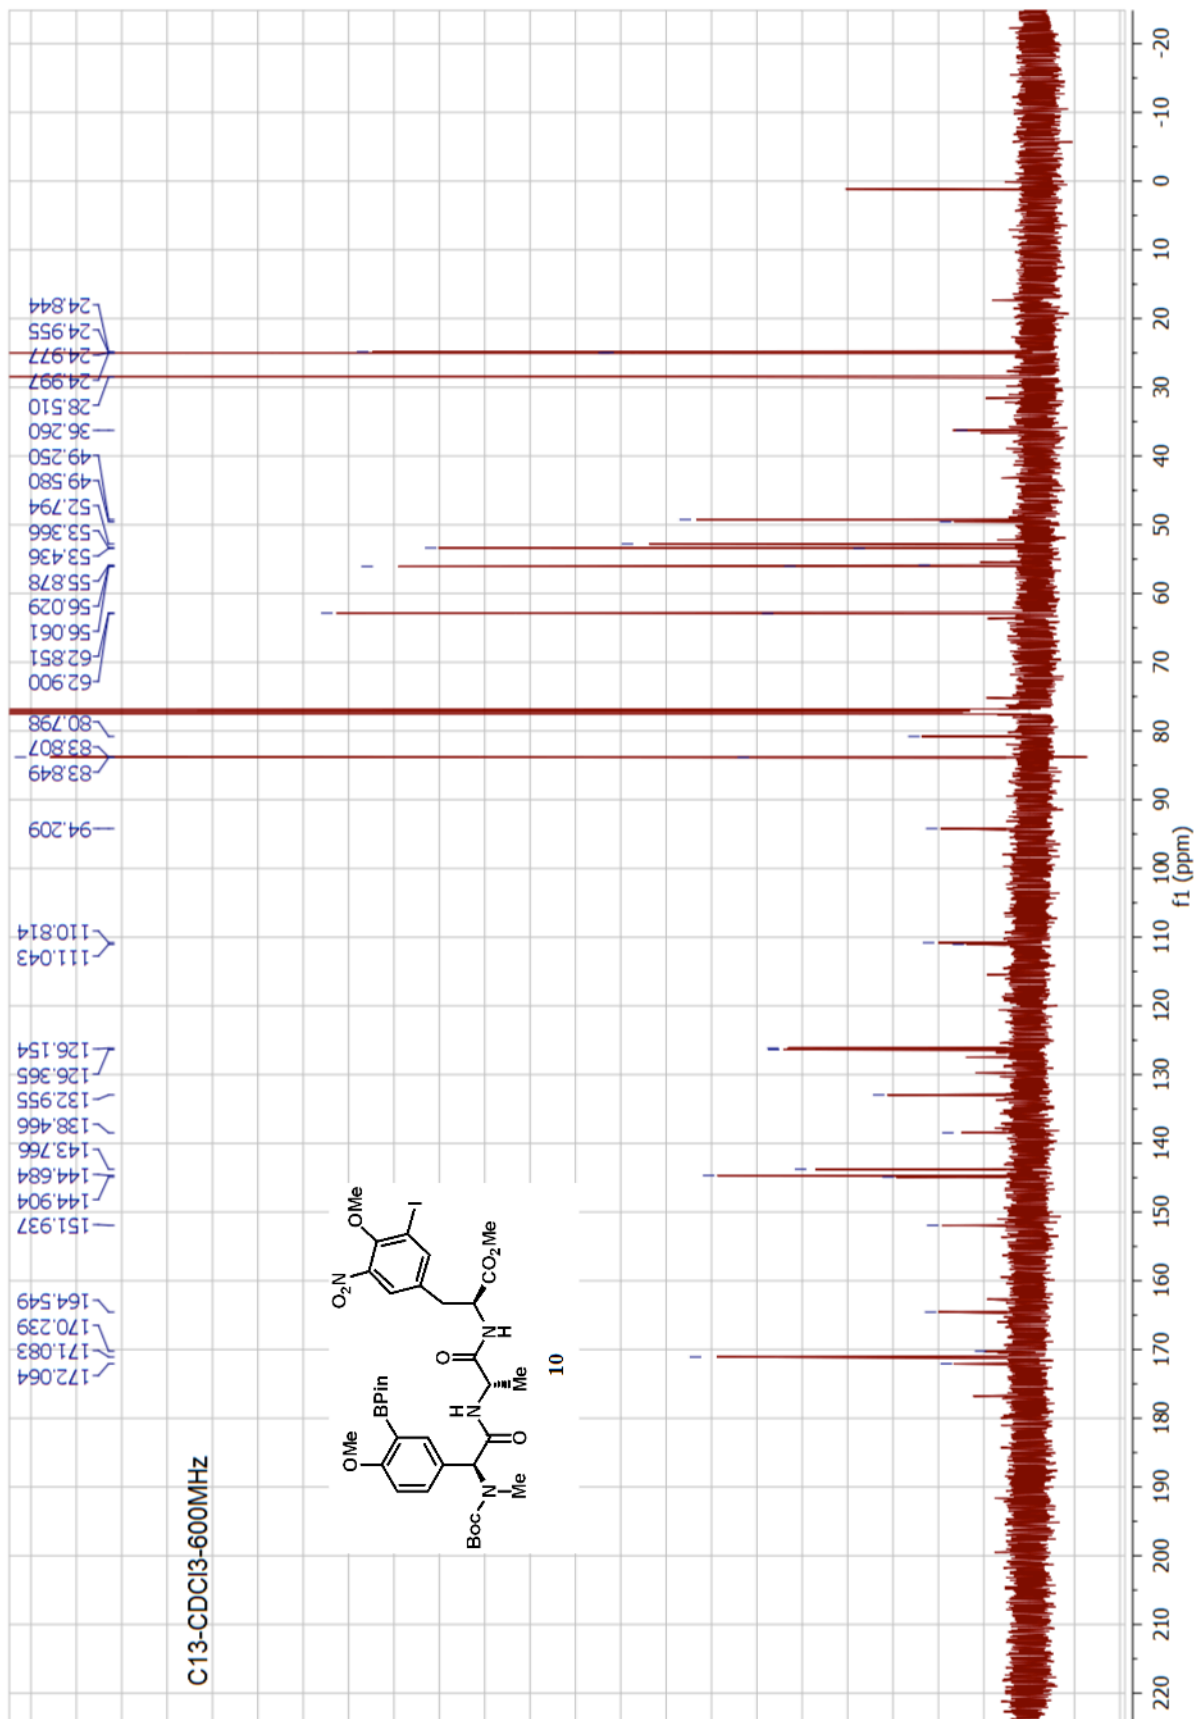

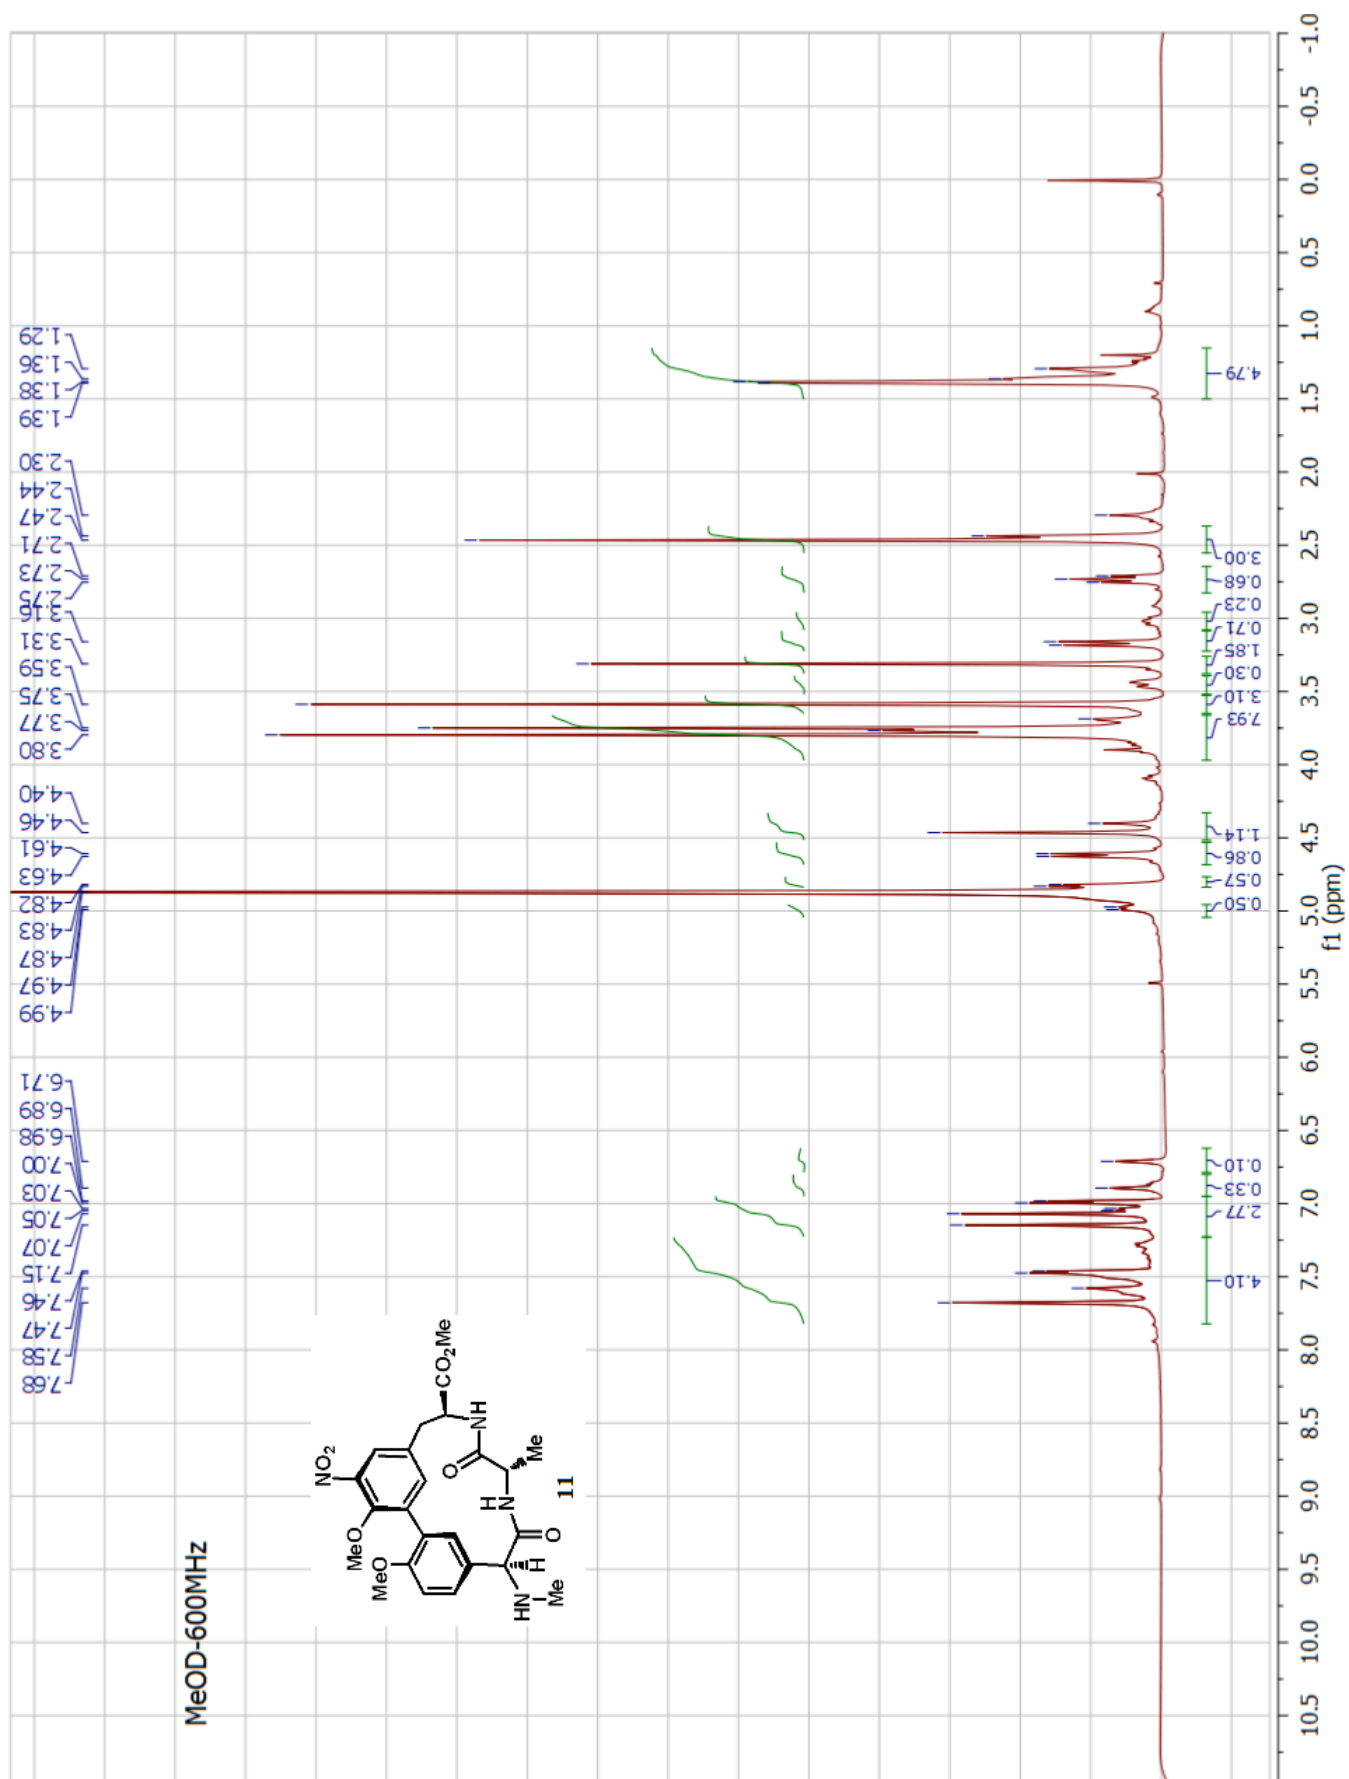

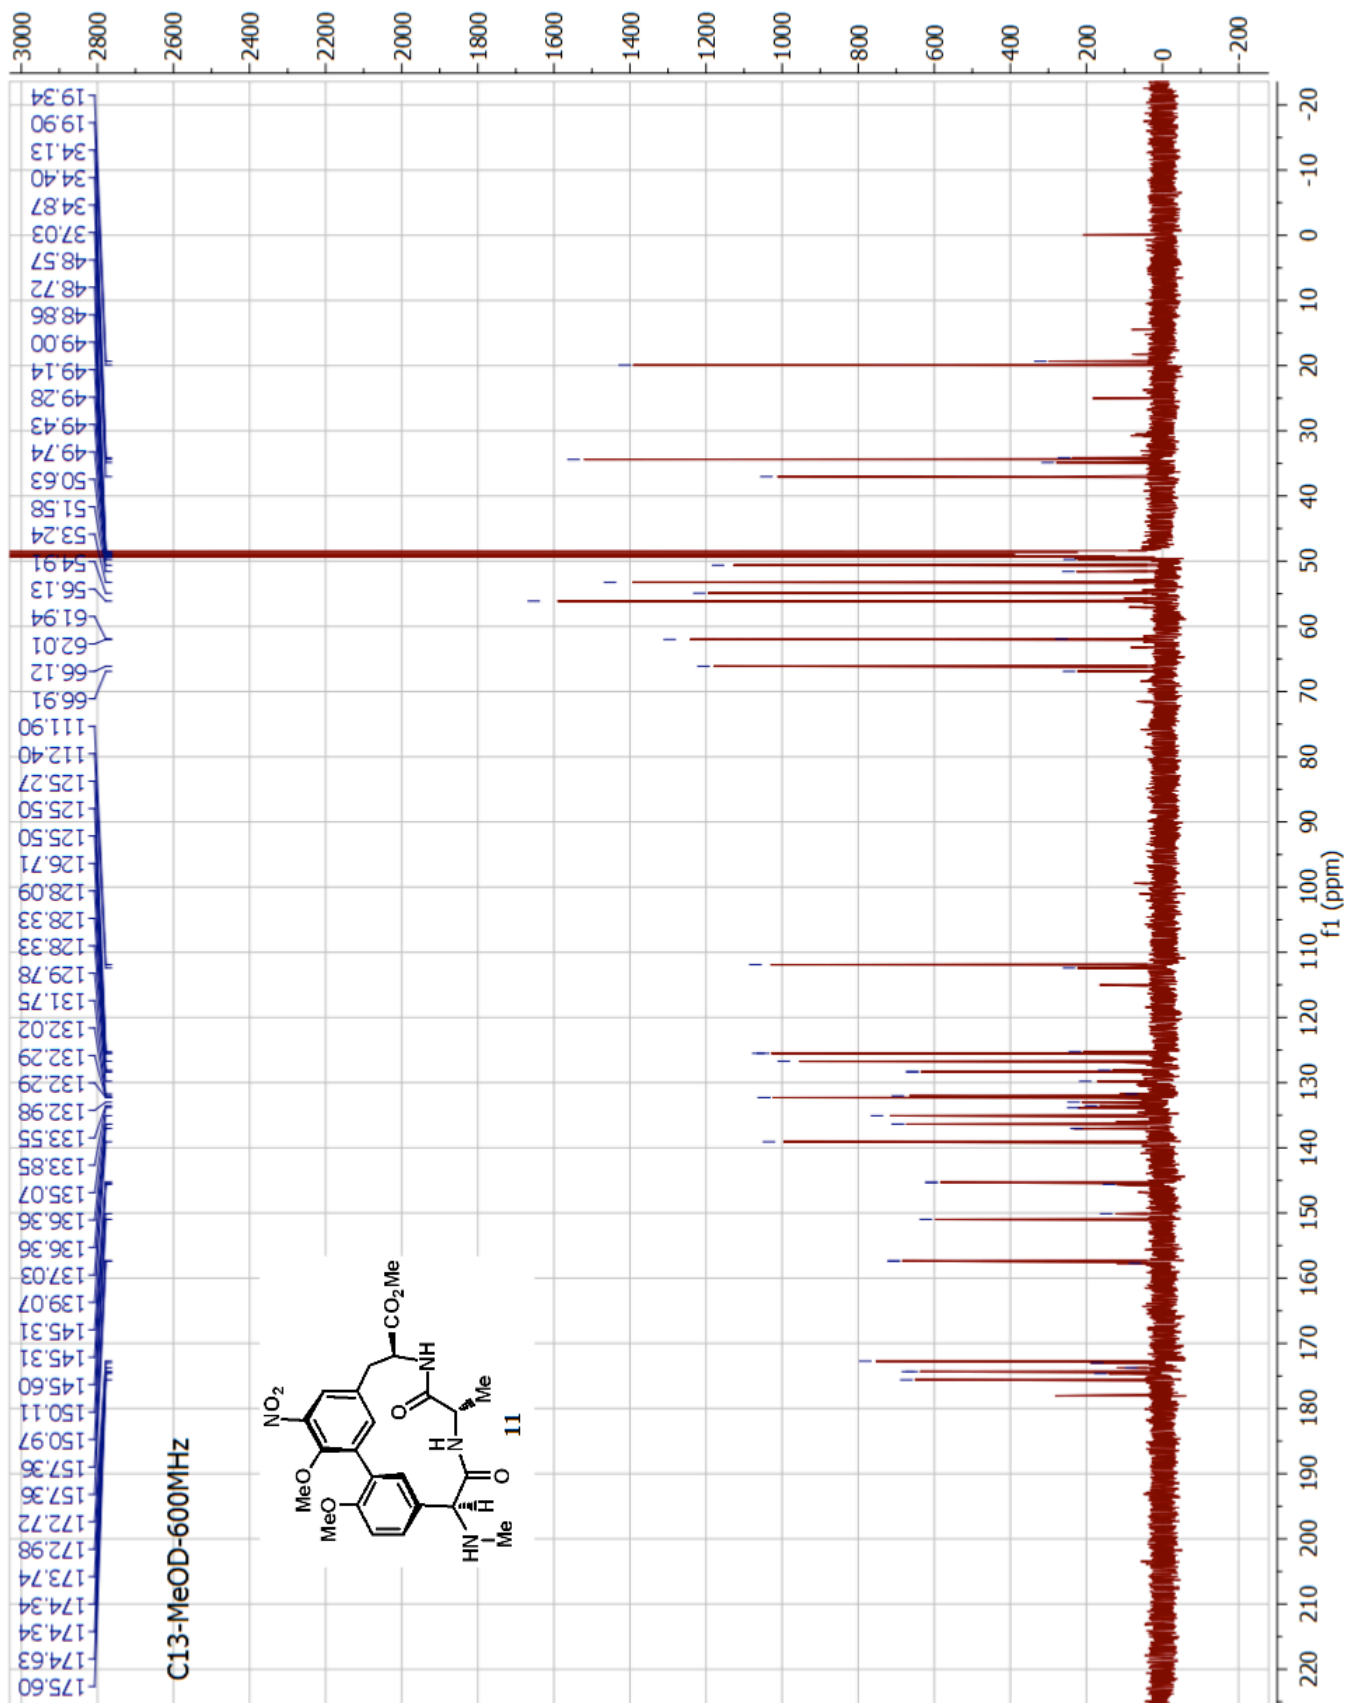

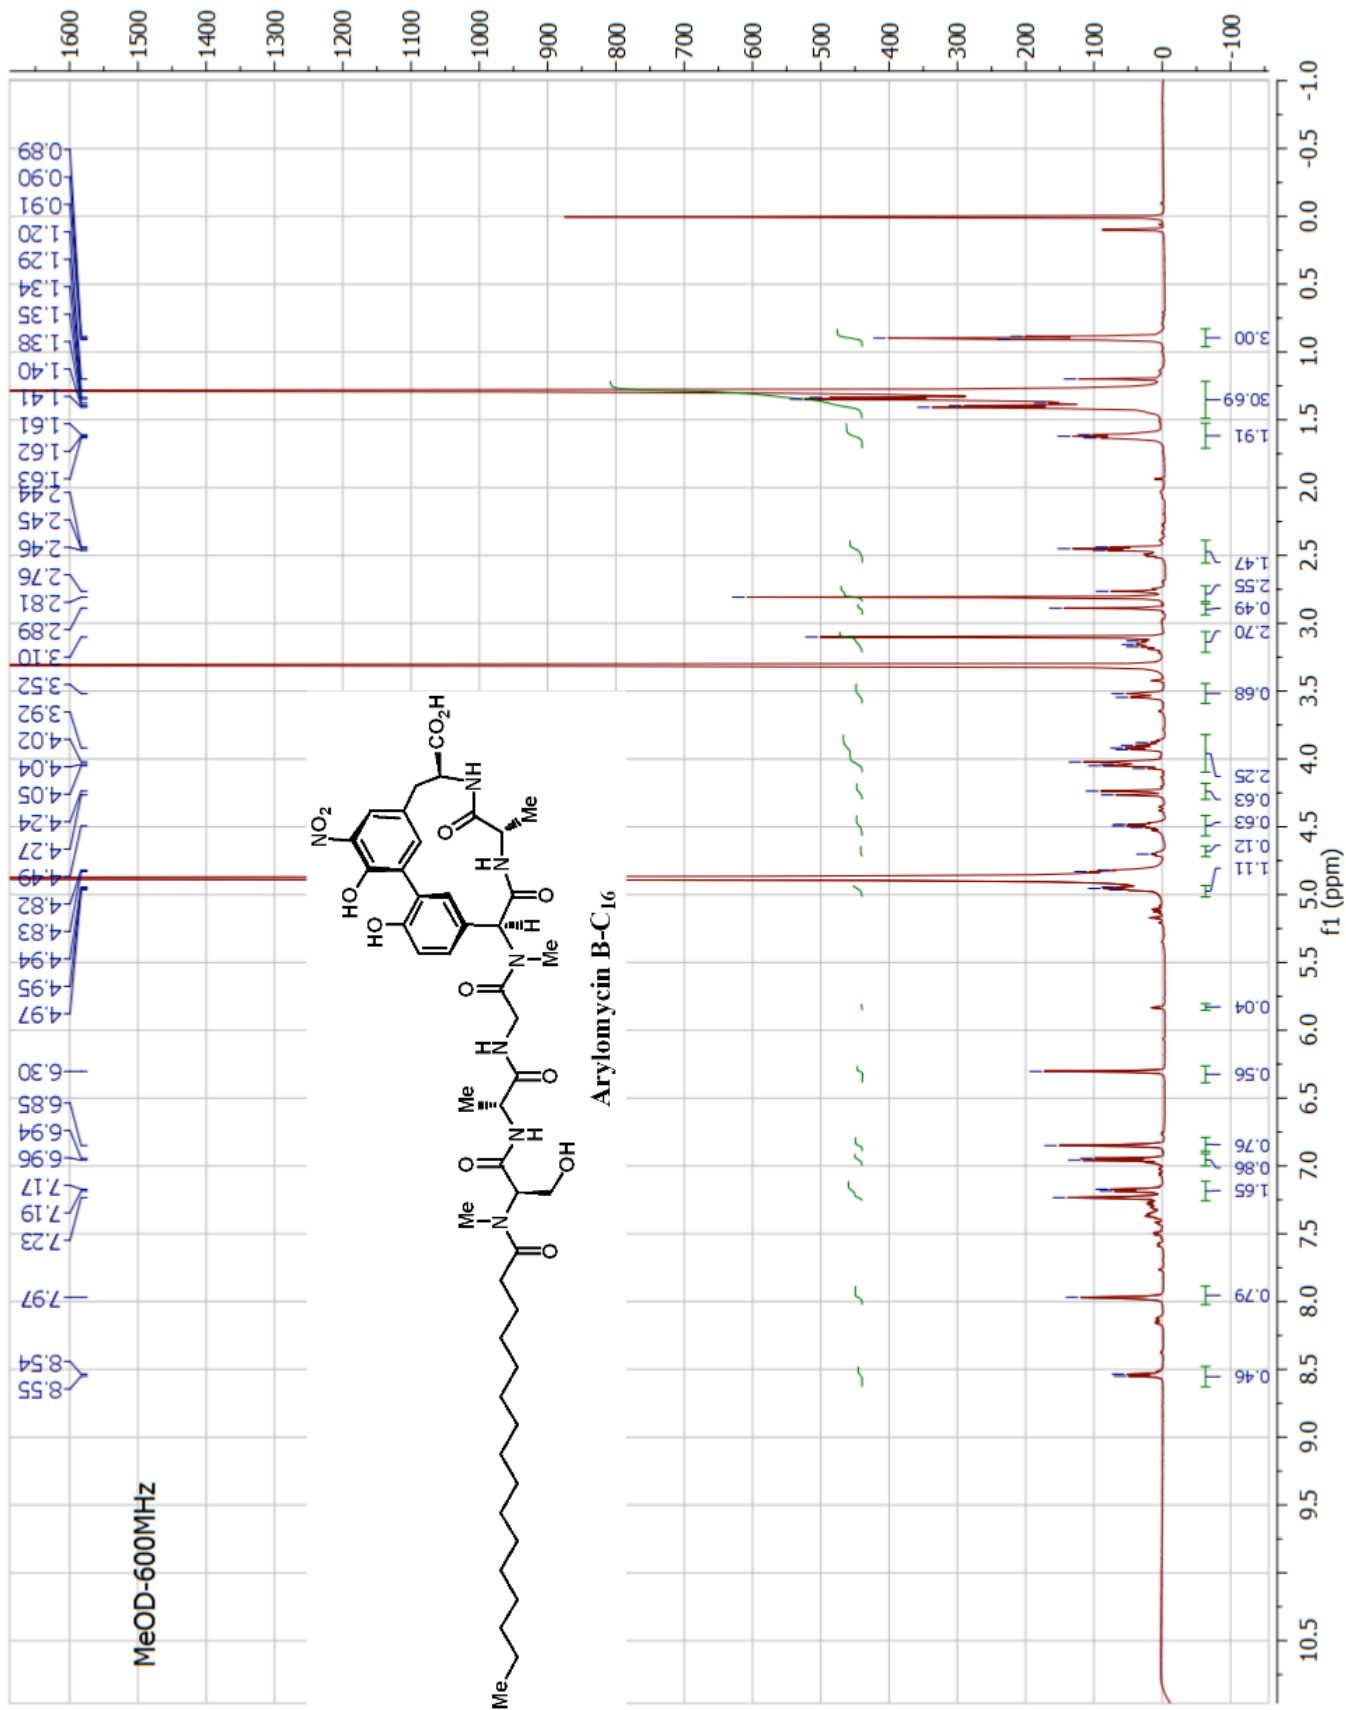

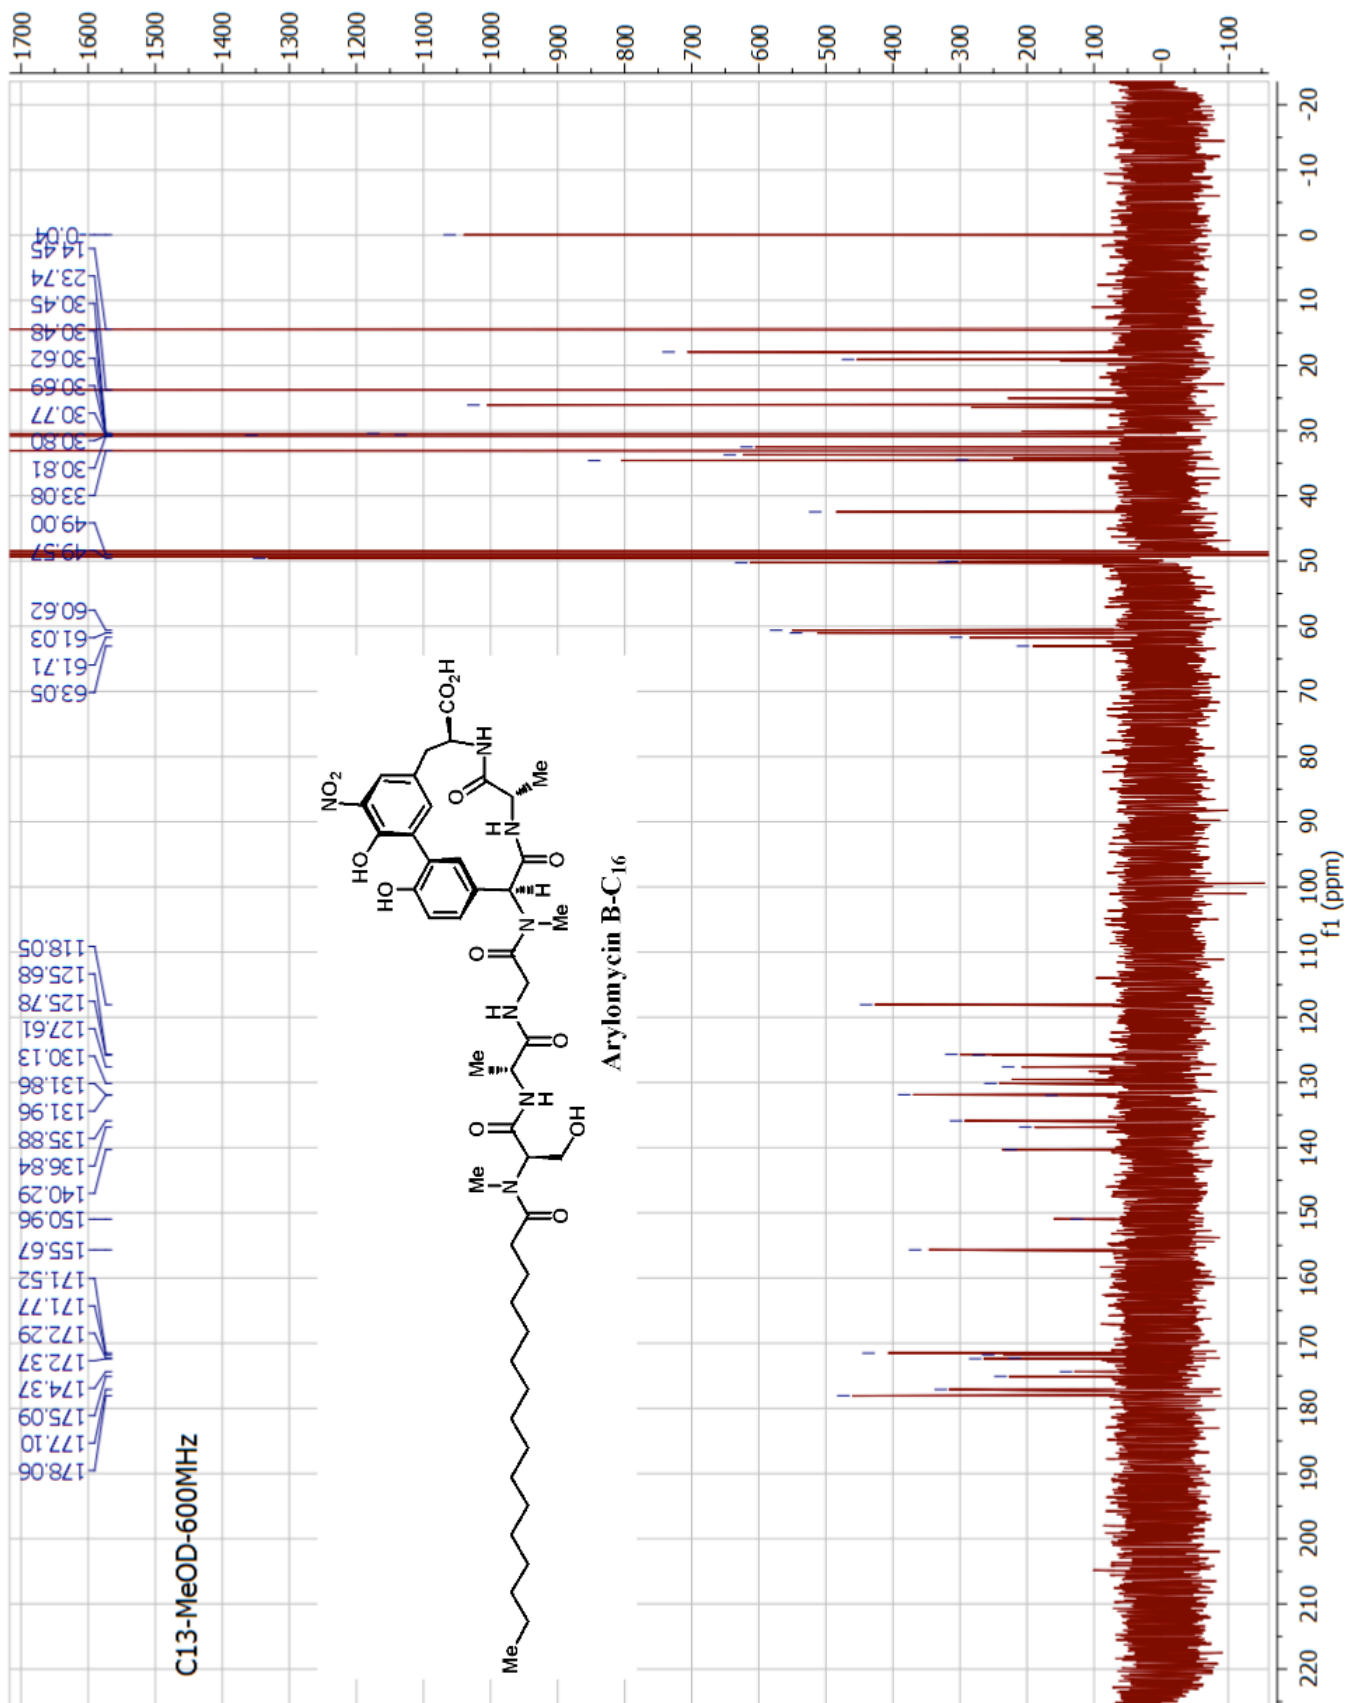

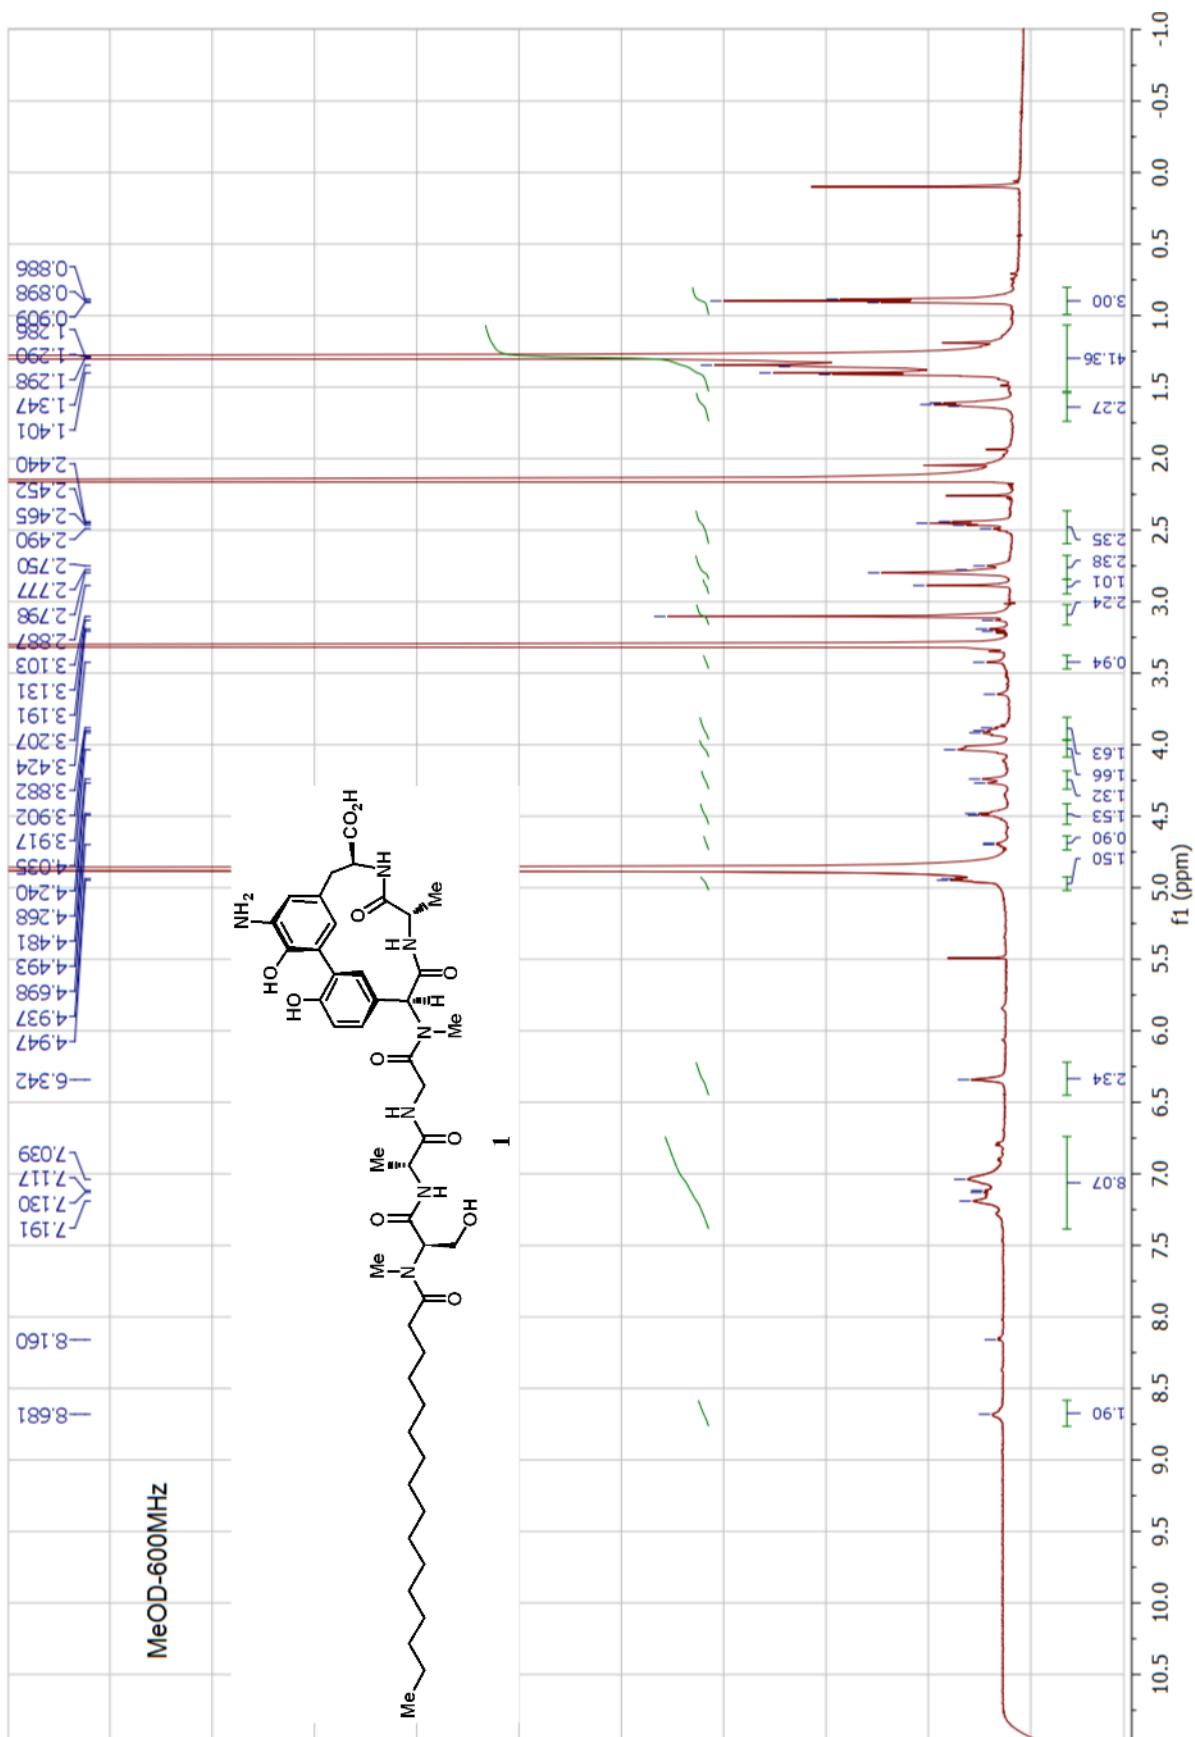

Supplement: NIHMS295674-supplement-1_si_001.pdf [file NIHMS295674-supplement-1_si_001.pdf]
